# Supplementary material
Source: Springer Nature journal article supplement (https://www.springermedizin.de/resource/supplementary/12958_2011_854_MOESM8_ESM.pdf/9569002)

# Immunostaining- Flotillin-1 (FLOT1)

Primary hEEC cells

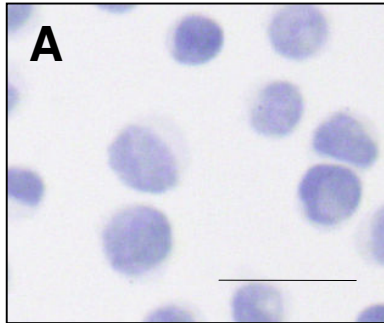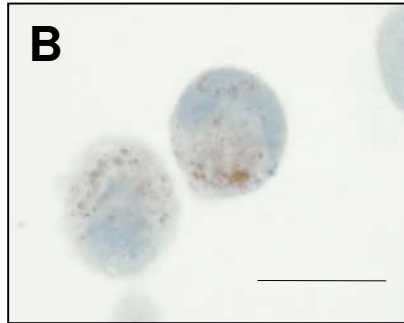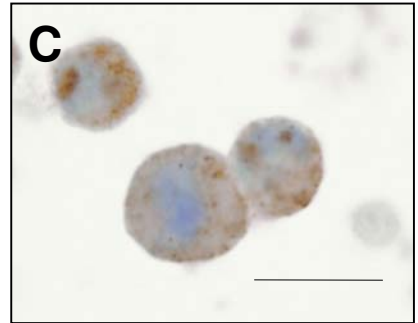

EEC-1 cells

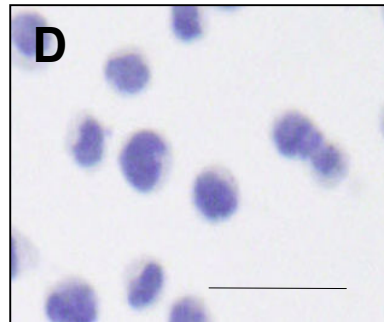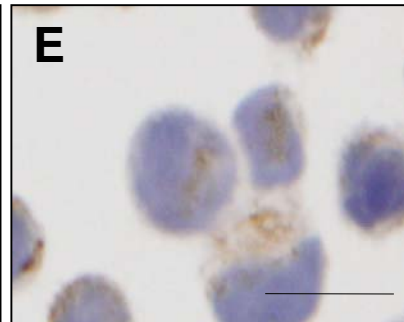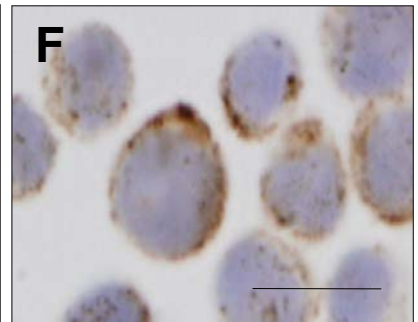

Supplement: MOESM8 [file 9569002]
